# Supplementary material for: Ultra-high aspect ratio functional nanoporous silicon via nucleated catalysts
Source: Royal Society of Chemistry journal article supplement (doi:10.1039/c7ra00562h), 2017-01-01
Supplement: c7ra00562h1.pdf [file c7ra00562h1.pdf]

SUPPORTING INFORMATION

RSC Advances

**Ultra-high aspect ratio functional nanoporous silicon via nucleated catalysts**

By Jatin J. Patil, Brendan D. Smith, and Jeffrey C. Grossman\*

\* Corresponding author ([jcg@mit.edu](mailto:jcg@mit.edu))

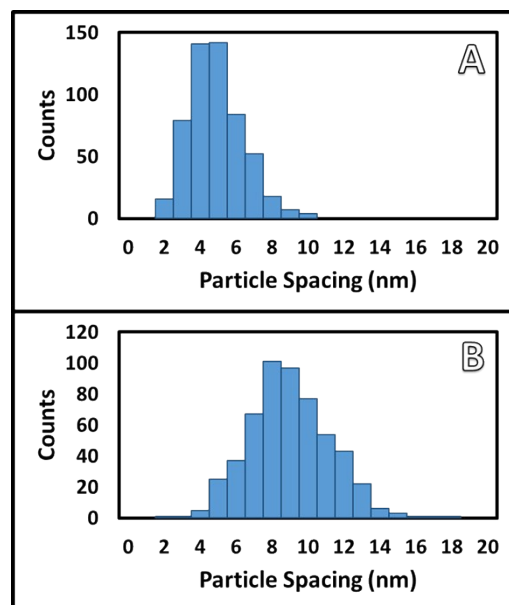

**Figure S-1.** Nano-island spacing for nucleated Au (A) and Ag (B) catalysts. Spacing is defined as the separation distance between the center of a nanoisland and the center of its closest neighboring pore. Histograms are based on TEM images shown in **Figure 1**.

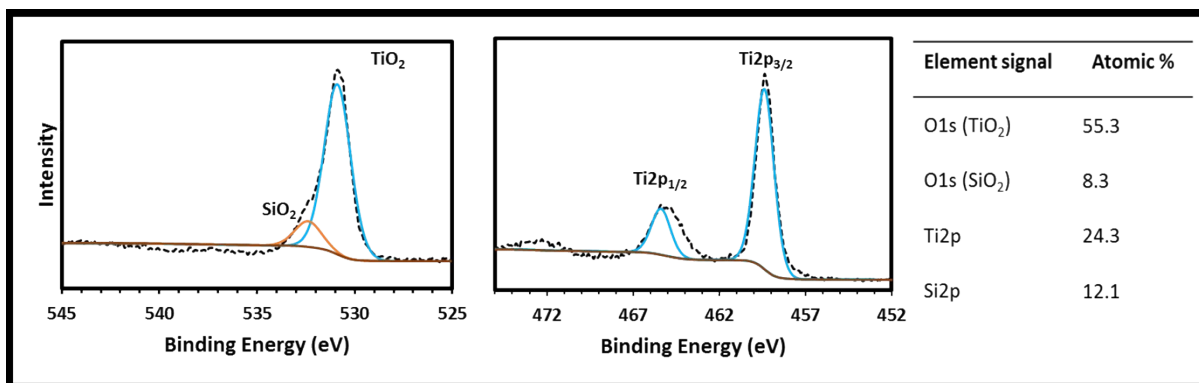

**Figure S-2.** High resolution XPS scans of O and Ti from ALD-processed NPSi. O1s signal is deconvoluted to separate peaks associated with SiO<sub>2</sub> and TiO<sub>2</sub> oxygen signals. Deconvoluted data yields a final O:Ti ratio of 2.3. Dotted line represents original data, blue line represents fitted TiO<sub>2</sub> data fit, and orange line represents SiO<sub>2</sub> data fit.
